# Supplementary material for: Enhanced negative magnetoresistance near the charge neutral point in Cr doped topological insulator
Source: Royal Society of Chemistry journal article supplement (doi:10.1039/d1ra02079j), 2021-01-01
Supplement: d1ra02079j1.pdf [file d1ra02079j1.pdf]

## Supplementary Information

### **Enhanced negative magnetoresistance near the charge neutral point in Cr doped topological insulator**

Qixun Guo<sup>1</sup>, Yu Wu<sup>1,2</sup>, Dongwei Wang<sup>3</sup>, Gang Han<sup>4</sup>, Xuemin Wang<sup>4</sup>, Libo Fu<sup>5</sup>,  
Lihua Wang<sup>5</sup>, Wei He<sup>6</sup>, Tao Zhu<sup>6</sup>, Zhendong Zhu<sup>7</sup>, Tao Liu<sup>8</sup>, Guanghua Yu<sup>1</sup>, Jiao  
Teng<sup>1\*</sup>

<sup>1</sup>Department of Material Physics and Chemistry, University of Science and  
Technology Beijing, Beijing 100083, P. R. China

<sup>2</sup>Beijing Tongfang Huachuang Technology Co., Ltd., Beijing 100089, P. R. China

<sup>3</sup>CAS Key Laboratory of Standardization and Measurement for Nanotechnology,  
National Center for Nanoscience and Technology, Beijing 100190, P. R. China

<sup>4</sup>Collaborative Innovation Center of Advanced Steel Technology, University of Science  
and Technology Beijing, Beijing 100083, P. R. China

<sup>5</sup>Institute of Microstructure and Property of Advanced Materials, Beijing Key Lab of  
Microstructure and Property of Advanced Materials, Beijing University of Technology,  
Beijing 100124, P. R. China

<sup>6</sup>Beijing National Laboratory for Condensed Matter Physics and Institute of Physics,  
Chinese Academy of Sciences, Beijing 100190, P. R. China

<sup>7</sup>National Institute of Metrology, Beijing 100029, P. R. China

<sup>8</sup>National Engineering Research Center of Electromagnetic Radiation Control  
Materials, University of Electronic Science and Technology of China, Chengdu  
610054, P. R. China

Figure S1. (a) Scheme of co-sputtering process and crystal structure of CBST. (b) High-resolution TEM (HRTEM) image of a CBST thin film. (c, d) HRTEM image of the red square in (b) and corresponding FFT pattern.

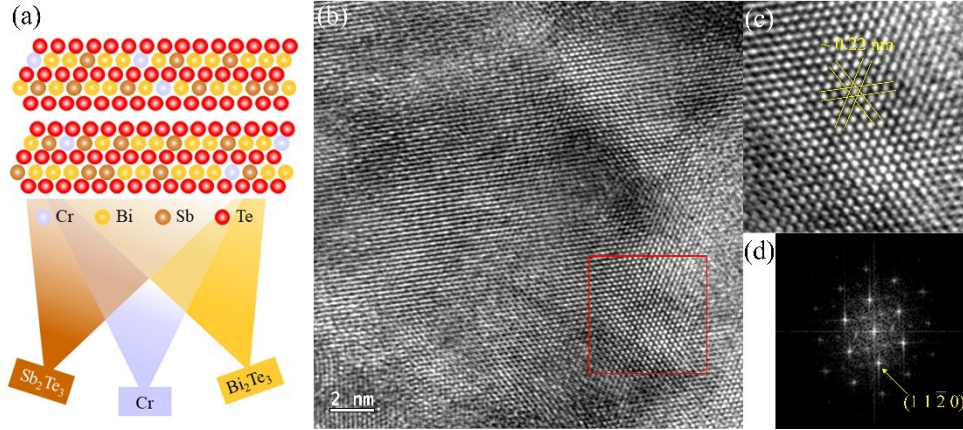

We use magnetron co-sputtering to fabricate CBST thin films (Fig. S1(a)). A chemical etch by hydrofluoric acid is performed to remove the  $SiO_2$  under the CBST sample, leaving the large area CBST thin films. Then we transferred the free-standing CBST thin film onto a holey carbon support film. High-resolution TEM (HRTEM) image of the CBST2 thin film (Fig. S1(c)) and fast Fourier transformation (FFT) pattern (Fig. S1(d)) show the hexagonal lattice with a lattice spacing of 2.2 Å, consistent with the spacing of the (1 1 -2 0) planes of layered  $Bi_2Se_3$ <sup>1,2</sup>.

Figure S2. The MR curves at different temperatures of CBST1(a), CBST2(b) and CBST3(c).

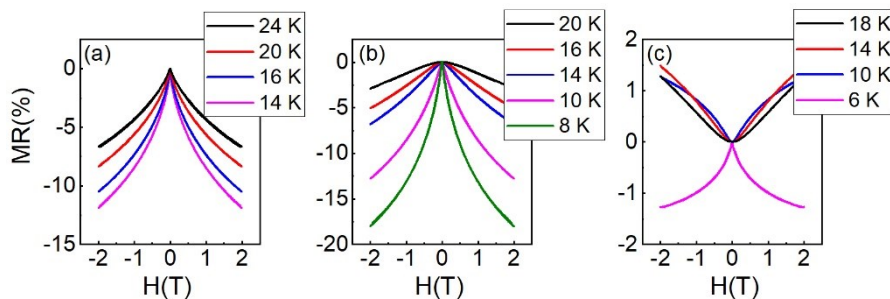

For CBST1 and CBST2, the MR is always negative below 20 K. The negative MR is similar to that commonly observed in dilute magnetic semiconductors, in which the ferromagnetism is originated from the hole-mediated coupling between magnetic

dopants based on the RKKY interaction<sup>3-6</sup>. In the RKKY mechanism, the Curie temperature  $T_c$  is proportional to  $p^{1/3}$ , where  $p$  is the hole density<sup>7</sup>. Therefore, the  $p$ -type CBST1 sample has the highest  $T_c$  (Fig. 3(e)), which can be attributed to enhancing the RKKY-like ferromagnetism due to the highest hole density in this sample. Given the fact that the hole-mediated RKKY interaction is completely suppressed in a system with only electron carriers, the ferromagnetism in CBST3 is dominant by the carrier-independent van Vleck mechanism. For CBST3, the evolution of MR with decreasing temperature is complex. At  $T > T_c$  (11 K), there is no long-range ferromagnetic order, and a positive MR is observed (Fig. S2(c)), which is common in pristine topological insulator due to the WAL of surface states. At  $T = 10$  K (near the  $T_c$ ), the MR is still positive, and the curve in the small field is sharper than that of  $T = 14$  and 18 K, which means stronger WAL at lower temperatures. However, at the large magnetic field, the MR curve increases more slowly than the 14 and 18 K curves. The MR behavior at  $T = 10$  K can be described as the competition of topology-induced WAL and magnetism-induced negative MR, and the WAL is stronger than magnetism-induced negative MR. For  $T = 6$  K  $< T_c$ , the ferromagnetism is strong enough to cause the negative MR. Therefore, the complex MR behavior reflects the competition between topology-induced WAL and magnetism-induced negative MR<sup>8</sup>.

Figure S3. Arrott plots at various temperatures near  $T_c$  for CBST1(a), CBST2(b) and CBST3(c). The  $T_c$ s of CBST1, CBST2 and CBST3 are 21, 11 and 12 K, respectively.

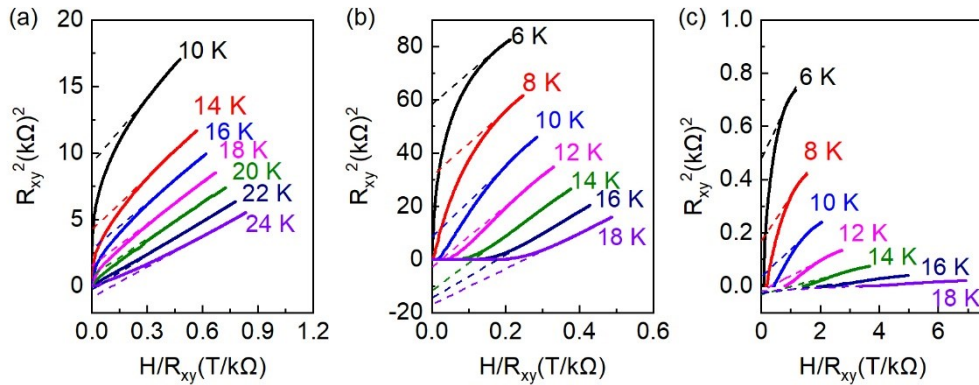

Figure S4. X-ray diffraction (XRD) patterns for magnetically doped CBST1, CBST2, CBST3 (a) and pristine BST (b) samples.

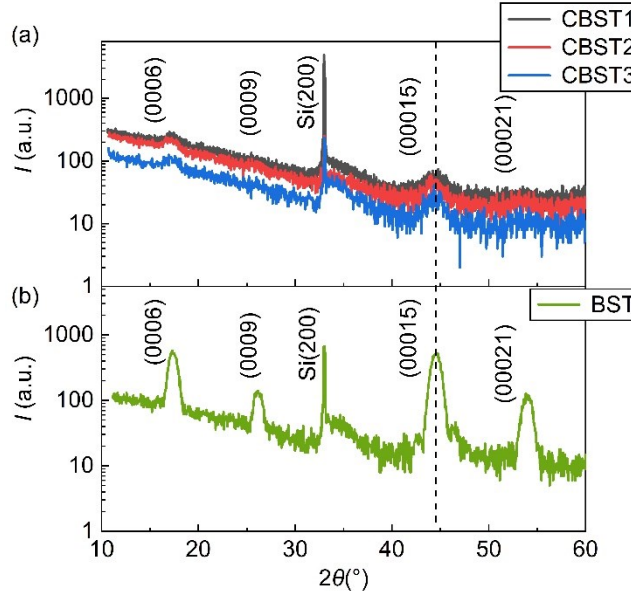

In fig. S4, the CBST and BST samples only have  $(0\ 0\ 0\ 3n)$  peaks, indicating that the samples have preferred orientation of  $c$ -axis, which is consistent with the results in ref. 9. We have noticed that the XRD peaks of our Cr doped samples are much weaker than the pristine BST sample, revealing the presence of a strong disorder due to the Cr doping. There is no shift of the XRD peak positions among CBST1, CBST2, and CBST3, revealing that the lattice constants of the  $c$ -axis for three samples are very similar. Besides, there is no obvious shift of  $(0\ 0\ 0\ 15)$  peaks of the Cr doped samples and pristine BST, indicating the Cr doping in our sample does not change the  $c$  lattice parameter. Because the ionic radius of Cr is smaller than that of Bi, the unchanged  $c$  lattice parameter indicates that Cr not only substitutes Bi atoms but also locates in the Van der Waals gaps between quintuple layers.

Table 1 The dielectric constants ( $\epsilon_r$ ) and electric-field-induced areal charge density ( $\Delta n$ ) using the following dielectrics as gate materials.

|                       | $\text{SiO}_2$ | $\text{Al}_2\text{O}_3$ | $\text{SrTiO}_3$ | ionic liquid |
|-----------------------|----------------|-------------------------|------------------|--------------|
| <b>Max voltage(V)</b> | 120            | 11                      | 210              | 2            |
| $\epsilon_r$          | 3.9            | 9                       | 20000            | 10           |
| <b>Thickness(nm)</b>  | 300            | 15                      | 200000           | 1            |

The electric-field-induced areal charge density ( $\Delta n$ ) can be calculated using the equation  $\Delta n = \varepsilon_0 \varepsilon_r V_g / et$ , where  $\varepsilon_0$  and  $\varepsilon_r$  are the permittivities of vacuum and dielectrics, respectively;  $e$  is the electron charge;  $V_g$  is the electric voltage applied to the dielectrics;  $t$  is the thickness of dielectrics. Using  $\varepsilon_{\text{SiO}_2}=3.9$ ,  $\varepsilon_{\text{Al}_2\text{O}_3}=9$ ,  $t_{\text{SiO}_2}=300$  nm,  $t_{\text{Al}_2\text{O}_3}=15$  nm,  $V_{g,\text{SiO}_2}=120$  V and  $V_{g,\text{Al}_2\text{O}_3}=11$  V,  $\Delta n_{\text{Al}_2\text{O}_3}/\Delta n_{\text{SiO}_2}$  is estimated to be 4, that is,  $\text{Al}_2\text{O}_3$  as a dielectric is 4 times the tunability of the carrier density of  $\text{SiO}_2$ . Besides, both of  $\text{SrTiO}_3$  and ionic liquid, also commonly used dielectrics, have much larger tunability of the carrier density than  $\text{SiO}_2$ .

In the previous work<sup>10</sup>, for the same sample, three regions (hole-doped, electron-hole puddles, and electron-doped regions) can be observed by tuning the gate voltage. However, limited to the relatively weak tunability of Si/SiO<sub>2</sub> substrate, it is hard to observe more than one region for one sample. Therefore, in this work, changing the Bi/Sb ratio is a coarse tune of the Fermi level and carrier density. To realize accurate and continuous tuning of the Fermi level and carrier density, electric-field gating is also employed.

## References

- <sup>1</sup>D. Kong, W. Dang, J. J. Cha, H. Li, S. Meister, H. Peng, Z. Liu, and Y. Cui, *Nano Lett.* **10**, 2245 (2010).
- <sup>2</sup>L. Bao, L. He, N. Meyer, X. Kou, P. Zhang, Z. G. Chen, A. V. Fedorov, J. Zou, T. M. Riedemann, T. A. Lograsso, K. L. Wang, G. Tuttle, and F. Xiu, *Sci. Rep.* **2**, 726 (2012).
- <sup>3</sup>Tomasz Dietl and Hideo Ohno, *Rev. Mod. Phys.* **86**, 187 (2014).
- <sup>4</sup>Yu Wu, Qixun Guo, Qi Zheng, Xiulan Xu, Tao Liu, Yang Liu, Yu Yan, Dongwei Wang, Shibing Long, Lijin Wang, Shanwu Yang, Jiao Teng, Shixuan Du, and Guanghua Yu, *The Journal of Physical Chemistry C* **123**, 3823 (2019).
- <sup>5</sup>Wenbo Wang, Yunbo Ou, Chang Liu, Yayu Wang, Ke He, Qi-Kun Xue, and Weida Wu, *Nat. Phys.* **14**, 791 (2018).
- <sup>6</sup>X. F. Kou, M. R. Lang, Y. B. Fan, Y. Jiang, T. X. Nie, J. M. Zhang, W. J. Jiang, Y. Wang, Y. G. Yao, L. He, and K. L. Wang, *ACS Nano* **7**, 9205 (2013).

<sup>7</sup>Bin Li, Qingyan Fan, Fuhao Ji, Zhen Liu, Hong Pan, and S Qiao, *Phys. Lett. A* **377**, 1925 (2013).

<sup>8</sup>Z. Zhang, X. Feng, M. Guo, K. Li, J. Zhang, Y. Ou, Y. Feng, L. Wang, X. Chen, K. He, X. Ma, Q. Xue, and Y. Wang, *Nat. Commun.* **5**, 4915 (2014).

<sup>9</sup>J. G. Checkelsky, R. Yoshimi, A. Tsukazaki, K. S. Takahashi, Y. Kozuka, J. Falson, M. Kawasaki, and Y. Tokura, *Nat. Phys.* **10**, 731 (2014).

<sup>10</sup>L. He, X. Kou, M. Lang, E. S. Choi, Y. Jiang, T. Nie, W. Jiang, Y. Fan, Y. Wang, F. Xiu, and K. L. Wang, *Sci Rep* **3**, 3406 (2013).
